# Supplementary material for: Factors Associated with Men’s Awareness of Danger Signs of Obstetric Complications and Its Effect on Men’s Involvement in Birth Preparedness Practice in Southern Ethiopia, 2014
Source: Hindawi journal article supplement (doi:10.1155/2015/386084), 2015-01-01
Supplement: f1 [file 386084.f1.pdf]

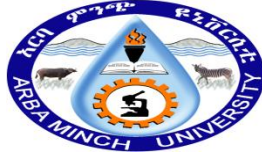

**Arba Minch University, College of Medicine and Health science, Department  
of Public Health**

**Questionnaire to Assess Men's Awareness on Danger Sign of Obstetric  
Complication and Factors Associated with it at Chencha district of Gamo  
Gofa Zone, South Ethiopia.**

**INTRODUCTION AND CONSENT:**

Hello. My Name is \_\_\_\_\_ and I am part of a team of people who are carrying out a survey on **“Men's awareness on danger sign of obstetric complication and factors associated with it at South Ethiopia.”** (Show a letter of approval from Arba Minch University). We will very much appreciate your participation in this survey. I would like to ask you some questions and it would take about 30-40 minutes.

Your answers will remain confidential, and we will not be taking down your name or address, so your answers will be anonymous.

Participation in this survey is voluntary and you can choose not to answer any individual question or all of the questions. However, we hope that you will participate in this survey since your views are important.

At this time, do you want to ask me anything about the survey?

Do you agree to participate in this study? Yes \_\_\_\_\_ No \_\_\_\_\_

May I begin the interview now? 1. Yes 2. No

If no, go to the next house.

Thank you for your Cooperation.

## English questionnaires

|                     |                                                                                                                                  |                                                                                                        |                                                                                                   |
|---------------------|----------------------------------------------------------------------------------------------------------------------------------|--------------------------------------------------------------------------------------------------------|---------------------------------------------------------------------------------------------------|
| Questionnaires No:  |                                                                                                                                  |                                                                                                        |                                                                                                   |
| Household Id No:    |                                                                                                                                  |                                                                                                        |                                                                                                   |
| Urban/Rural:        |                                                                                                                                  |                                                                                                        |                                                                                                   |
| Date:               |                                                                                                                                  |                                                                                                        |                                                                                                   |
| Interviewer's Name: |                                                                                                                                  |                                                                                                        |                                                                                                   |
| Time:               |                                                                                                                                  |                                                                                                        |                                                                                                   |
| <b>Result</b>       | <ul style="list-style-type: none"> <li>• Completed</li> <li>• Household Absent</li> <li>• Time and Date Set For Later</li> </ul> | <ul style="list-style-type: none"> <li>• Dwelling not Found</li> <li>• Incomplete Interview</li> </ul> | <ul style="list-style-type: none"> <li>• Refused</li> <li>• Other: (Specify)<br/>_____</li> </ul> |

|                  | Name | Data | Signature |
|------------------|------|------|-----------|
| Field edited by  |      |      |           |
| Office edited by |      |      |           |

Time Interview Started: Hour: \_\_\_\_\_ Minute: \_\_\_\_\_

Time Interview Ended: Hour: \_\_\_\_\_ Minute: \_\_\_\_\_

## SECTIONS ONE: DEMOGRAPHIC AND SOCIOECONOMIC CHARACTERISTICS

| S.No. | Questions and filters                   | Code                                                                                                                                                 | Remark |
|-------|-----------------------------------------|------------------------------------------------------------------------------------------------------------------------------------------------------|--------|
| 101   | Participant ID                          | _____                                                                                                                                                |        |
| 102   | Residences                              | Urban .....1<br>Rural .....2                                                                                                                         |        |
| 103   | Age of the participants?                | _____years 2. I don't know                                                                                                                           |        |
| 104   | Marital status?                         | Married .....01<br>Divorced .....02<br>Single .....03<br>Widowed .....04<br>Other .....05                                                            |        |
| 105   | Religion of parents/caretaker?          | Protestant .....22<br>Orthodox .....23<br>Muslim .....24<br>Catholic .....25<br>Other(specify) _____ 26                                              |        |
| 106   | Ethnic group?                           | Gamo .....31<br>Goffa .....35<br>Wolaita .....36<br>Amara .....32<br>Oromo .....33<br>Gurage .....34<br>Others(specify) _____ 99                     |        |
| 107   | Educational level of mother if married? | No education .....41<br>Primary education .....42<br>Secondary education .....43<br>More than secondary education .....44                            |        |
| 108   | Occupation of the mother?               | Housewife .....51<br>Farmer .....52<br>Government employee's .....53<br>Private gainful work .....54<br>Merchant .....55<br>Other (specify) _____ 99 |        |
| 108   | Age of the mother?                      | _____years 2. I don't know.                                                                                                                          |        |
| 110   | Educational level of the father         | No education .....61<br>Primary education .....62<br>Secondary education .....63<br>More than secondary education .....64                            |        |
| 111   | Occupation of the respondents?          | Farmer .....71<br>Merchant .....72<br>Government employee .....73<br>No job .....74                                                                  |        |

|     |                                                                                    |                                                                                                                                                                                                                                                                          |                                                                                                                                                                                                                                         |
|-----|------------------------------------------------------------------------------------|--------------------------------------------------------------------------------------------------------------------------------------------------------------------------------------------------------------------------------------------------------------------------|-----------------------------------------------------------------------------------------------------------------------------------------------------------------------------------------------------------------------------------------|
|     |                                                                                    | Private Job.....75<br>Other (specify)_____99                                                                                                                                                                                                                             |                                                                                                                                                                                                                                         |
| 112 | What is your average monthly income?                                               | _____ETB                                                                                                                                                                                                                                                                 |                                                                                                                                                                                                                                         |
| 112 | Household graduation status from Health extension program?                         | Yes .....01<br>No .....02                                                                                                                                                                                                                                                | If no<br>Skip to<br>115                                                                                                                                                                                                                 |
| 113 | When did the households graduated for HEP packages? (ask them to show certificate) | _____ Years.                                                                                                                                                                                                                                                             |                                                                                                                                                                                                                                         |
| 114 | What is your involvement in Health Development Army?                               | Leader .....21<br>Member.....22.<br>Not two of either .....99                                                                                                                                                                                                            |                                                                                                                                                                                                                                         |
| 115 | Wealth index for participants: Do you have?                                        |                                                                                                                                                                                                                                                                          |                                                                                                                                                                                                                                         |
|     | 1                                                                                  | Private home                                                                                                                                                                                                                                                             | 1. Yes          2. No                                                                                                                                                                                                                   |
|     | 2                                                                                  | A radio                                                                                                                                                                                                                                                                  | 1. Yes          2. No                                                                                                                                                                                                                   |
|     | 3                                                                                  | A mobile telephone                                                                                                                                                                                                                                                       | 1. Yes          2. No                                                                                                                                                                                                                   |
|     | 4                                                                                  | A table                                                                                                                                                                                                                                                                  | 1. Yes          2. No                                                                                                                                                                                                                   |
|     | 5                                                                                  | A chair                                                                                                                                                                                                                                                                  | 1. Yes          2. No                                                                                                                                                                                                                   |
|     | 6                                                                                  | A bed with cotton/sponge/spring mattress                                                                                                                                                                                                                                 | 1. Yes          2. No                                                                                                                                                                                                                   |
|     | 7                                                                                  | A kerosene lamp/pressure lamp                                                                                                                                                                                                                                            | 1. Yes          2. No                                                                                                                                                                                                                   |
|     | 8                                                                                  | Annual farm product per quintal                                                                                                                                                                                                                                          | _____quintal                                                                                                                                                                                                                            |
|     | 9                                                                                  | Does household own any agricultural land                                                                                                                                                                                                                                 | 1. Yes          2. No                                                                                                                                                                                                                   |
|     | 10                                                                                 | How many (Local units) of agricultural land do you own                                                                                                                                                                                                                   | _____in hectares(Timadi Bere)                                                                                                                                                                                                           |
|     | 11                                                                                 | Presence of cattle's                                                                                                                                                                                                                                                     | 1. Yes          2. No                                                                                                                                                                                                                   |
|     | 12                                                                                 | How money of the following animal does this household own?<br>If yes give answer in no.<br><br><ul style="list-style-type: none"> <li>▪ Milk cows, oxen or bulls</li> <li>▪ Goats?</li> <li>▪ Sheep?</li> <li>▪ Chickens?</li> <li>▪ Horses, donkeys, or mule</li> </ul> | Write 00 if None, write 01 if More than one and write 11 if Unknown.<br><br><ul style="list-style-type: none"> <li>✓ ----- in no</li> </ul> |

|  |    |                 |              |  |
|--|----|-----------------|--------------|--|
|  |    |                 |              |  |
|  | 13 | Type of roof    | 1. Yes 2. No |  |
|  | 14 | Electric Mittad | 1. Yes 2. No |  |

**SECTIONS TWO: REPRODUCTIVE CHARACTERISTICS**

| NO  | Questions and filter                                                                                                                                                                                                                                                             | Code                                                                                                                                                                                                                                                           | Remark                                                                                                            |
|-----|----------------------------------------------------------------------------------------------------------------------------------------------------------------------------------------------------------------------------------------------------------------------------------|----------------------------------------------------------------------------------------------------------------------------------------------------------------------------------------------------------------------------------------------------------------|-------------------------------------------------------------------------------------------------------------------|
| 201 | Number of gravidity that your wife had?                                                                                                                                                                                                                                          | _____                                                                                                                                                                                                                                                          |                                                                                                                   |
| 202 | How many alive children you have(parity)?                                                                                                                                                                                                                                        | _____children                                                                                                                                                                                                                                                  |                                                                                                                   |
| 203 | Do You Know Of A Place Where A Woman Can Go To Give Birth To A Baby With Assistance From A Doctor, Nurse, Or Midwife?<br>If Yes: Where Is That?<br>Record All Places Mentioned.<br>If More Than One Facility Mentioned: Which Of These Health Facilities Is The Closest To Here? | <b>Home</b><br>Respondent's Home.....11<br>Tba's Home .....12<br><b>Public Sector</b><br>Gvt. Hospital.....21<br>Gvt. Health Centre. ....22<br>Health Post .....23<br>(Specify)<br><b>Private Sector</b><br>Pvt. Hospital.....31<br>Does-Not Know Place.....98 | <b>IF NO</b><br><br><b>301</b> |
| 204 | In your community, how would a woman go to this health facility?<br>PROBE: What type of transportation would she mainly use to get to the health facility?                                                                                                                       | Ambulance .....01<br>Kareza/Local Transportaion .....02<br>Taxi/Bus .....03<br>Cart .....04<br>Motor Bike .....05<br>On Foot.....07<br>Bicycle .....08<br>Other _____97<br>(Specify)<br>Don't Know.....98                                                      |                                                                                                                   |
| 205 | In general, how long would it take to reach this health facility?<br>If less than 2 hours, record in minutes. otherwise, record in hours.                                                                                                                                        | Hours .....1<br>Minutes.....2<br>Don't Know.....98                                                                                                                                                                                                             |                                                                                                                   |
| 206 | In your opinion, how are the services in this facility? Would you say they are excellent, good, average, or poor?                                                                                                                                                                | Excellent.....01<br>Good.....02<br>Average .....03<br>Poor.....04<br>Don't Know.....98                                                                                                                                                                         |                                                                                                                   |

|     |                                                                                                                                     |                                                                                                                                                                                                                                                                                                                                                                                                                                                                                                                                                                           |  |
|-----|-------------------------------------------------------------------------------------------------------------------------------------|---------------------------------------------------------------------------------------------------------------------------------------------------------------------------------------------------------------------------------------------------------------------------------------------------------------------------------------------------------------------------------------------------------------------------------------------------------------------------------------------------------------------------------------------------------------------------|--|
| 207 | <p>Can you tell me why you have ranked the services as [CHECK 206] _____?</p> <p>PROBE: What else?</p> <p>RECORD ALL RESPONSES.</p> | <p>Doctor Always There .....01</p> <p>Facility Always Open .....02</p> <p>Staff Respond To My Questions.....03</p> <p>Facility Always Has Necessary Medicines.....04</p> <p>Not A Long Wait.....05</p> <p>Staff Treat Women With Respect.....06</p> <p>Often Doctor Not There.....07</p> <p>Often Facility Is Closed.....08</p> <p>Staff Do Not Answer My Questions...09</p> <p>Facility Does Not Have Necessary Medicines.....10</p> <p>Long Wait To Be Seen .....11</p> <p>Staff Treat Women Poorly.....12</p> <p>Other _____ 97 (Specify)</p> <p>Don't Know.....98</p> |  |
|-----|-------------------------------------------------------------------------------------------------------------------------------------|---------------------------------------------------------------------------------------------------------------------------------------------------------------------------------------------------------------------------------------------------------------------------------------------------------------------------------------------------------------------------------------------------------------------------------------------------------------------------------------------------------------------------------------------------------------------------|--|

**SECTIONS THREE: AWARENESS QUESTIONS DURING LABOUR, CHILD BIRTH AND POST PARTUM**

| <b>No</b> | <b>Questions and filter</b>                                                                                                                                               | <b>Code</b>                                                                                                                                                                                                                                                                                                                                                                                                                                                                                |                          |
|-----------|---------------------------------------------------------------------------------------------------------------------------------------------------------------------------|--------------------------------------------------------------------------------------------------------------------------------------------------------------------------------------------------------------------------------------------------------------------------------------------------------------------------------------------------------------------------------------------------------------------------------------------------------------------------------------------|--------------------------|
| 301       | <p>In your opinion, can unforeseen problems related to pregnancy occur during any pregnancy or childbirth that could endanger the life of a woman?</p>                    | <p>Yes.....01</p> <p>No.....02</p> <p>Don't Know.....98</p>                                                                                                                                                                                                                                                                                                                                                                                                                                | <p>If no skip to 304</p> |
| 302       | <p>In your opinion, what are some serious health problems that can occur during pregnancy that could endanger the life of a pregnant woman?</p> <p>PROBE: Any others?</p> | <p>Bleeding .....01</p> <p>Severe Headache .....02</p> <p>Blurred Vision .....03</p> <p>Convulsions.....04</p> <p>Swollen Hands/Face.....05</p> <p>High Fever .....06</p> <p>Loss Of Consciousness.....07</p> <p>Difficulty Breathing.....08</p> <p>Severe Weakness.....09</p> <p>Severe Abdominal Pain .....10</p> <p>Accelerated/ Reduced Fetal Movement.....11</p> <p>Water Breaks Without Labor.....12</p> <p>Other _____ 97 (Specify)</p> <p>None.....00</p> <p>Don't Know.....98</p> |                          |
| 303       | <p>In your opinion, could a woman die</p>                                                                                                                                 | <p>Yes.....01</p>                                                                                                                                                                                                                                                                                                                                                                                                                                                                          |                          |

|     |                                                                                                                                                                            |                                                                                                                                                                                                                                                                                                                                                               |  |
|-----|----------------------------------------------------------------------------------------------------------------------------------------------------------------------------|---------------------------------------------------------------------------------------------------------------------------------------------------------------------------------------------------------------------------------------------------------------------------------------------------------------------------------------------------------------|--|
|     | from [this problem] any of these problems?                                                                                                                                 | No.....02<br>Don't Know.....98                                                                                                                                                                                                                                                                                                                                |  |
| 304 | In your opinion, what are some serious health problems that can occur during labor and childbirth that could endanger the life of a pregnant woman?<br>PROBE: Any others?  | Severe Bleeding.....01<br>Severe Headache .....02<br>Convulsions.....03<br>High Fever .....04<br>Loss Of Consciousness.....05<br>Labor Lasting >12 Hours.....06<br>Placenta Not Delivered<br>30 Minutes After Baby.....07<br>Other _____ 97<br>(Specify)<br>None.....00<br>Don't Know.....98                                                                  |  |
| 305 | In your opinion, could a woman die from [this problem] any of these problems?                                                                                              | Yes.....01<br>No.....02<br>Don't Know.....98                                                                                                                                                                                                                                                                                                                  |  |
| 306 | In your opinion, what are some serious health problems that can occur during the first 2 days after birth that could endanger the life of the woman?<br>PROBE: Any others? | Severe Bleeding.....01<br>Severe Headache .....02<br>Blurred Vision .....03<br>Convulsions.....04<br>Swollen Hands/Face.....05<br>High Fever .....06<br>Malodorous Vaginal Discharge.....07<br>Loss Of Consciousness.....08<br>Difficulty Breathing.....09<br>Severe Weakness.....10<br>Other _____ 97<br>(Specify)<br>None...../.....00<br>Don't Know.....98 |  |
| 307 | In your opinion, could a woman die from this problem] any of these problems?                                                                                               | Yes.....01<br>No.....02<br>Don't Know.....98                                                                                                                                                                                                                                                                                                                  |  |

**This is the end of interview**

**Thank you**
